# Supplementary material
Source: Elsevier journal article supplement (https://www.sciencedirect.com/science/article/pii/S2341287919300572)
Supplement: mmc1 [file S2341287919300572:mmc1.docx]

**DOCUMENTO DE CONSENSO DEL GRUPO DE TRABAJO DE INFECCIONES RESPIRATORIAS DE LA SOCIEDAD ESPAÑOLA DE INFECTOLOGIA PEDIATRICA. OSELTAMIVIR PARA EL TRATAMIENTO DE LA GRIPE EN NIÑOS Y ADOLESCENTES**

**Material online:**

**RESPUESTAS RAZONADAS Y REFERENCIADAS A LAS PREGUNTAS DE INTERÉS**

**INDICE**

SOBRE DIAGNÓSTICO:

¿Cómo debe hacerse el diagnóstico de gripe?

¿Se debe diagnosticar de forma clínica la gripe?

¿A quiénes deben de realizarse pruebas diagnósticas de la gripe?

¿Se deben realizar pruebas diagnósticas de la gripe en el ámbito hospitalario?

¿Se deben realizar pruebas diagnósticas de la gripe en el ámbito extrahospitalario?

¿Se deben realizar pruebas diagnósticas en la población con factores de riesgo?

¿Cuáles son los pruebas diagnósticas de elección en pediatría?

¿Cómo y cuándo debe hacerse la recogida de la muestra?

SOBRE OBJETIVOS DEL TRATAMIENTO:

¿Cuál es el objetivo que se persigue con el tratamiento? ¿Se debe utilizar oseltamivir con los siguientes objetivos?

Reducir la duración de los síntomas

Reducir la mortalidad

Reducir o prevenir el ingreso en UCIP

Evitar la tasa de hospitalización

Reducir la duración de la hospitalización

Reducir o prevenir las complicaciones pulmonares

Reducir o prevenir las complicaciones extrapulmonares

SOBRE EL TRATAMIENTO CON OSELTAMIVIR:

¿A quién debe ofrecerse tratamiento?

¿Debe ofrecerse tratamiento antiviral a la población general?

¿Debe ofrecerse tratamiento a todos los pacientes hospitalizados?

¿Debe ofrecerse tratamiento antiviral a la población con factores de riesgo?

¿Qué pacientes son susceptibles de quimioprofilaxis para prevenir la gripe?

**RECOMENDACIONES SOBRE DIAGNÓSTICO: ¿Cómo debe hacerse el diagnóstico de gripe?**

El diagnóstico de gripe es difícil en la edad pediátrica, especialmente en los lactantes y niños pequeños. Estudios de calidad moderada-alta demuestran que la sensibilidad y el valor predictivo positivo del diagnóstico clínico son bajos (inferiores al 40% en el global de los niños e inferiores al 25% en los menores de 3 años)1. La fiebre es el síntoma más frecuente, presente en el 95% y es el único predictor de gripe constante en todos los estudios. En los lactantes menores de 6 meses, con frecuencia la gripe presenta un cuadro clínico sugestivo de sepsis. La utilidad de la presencia de tos o dolor de garganta, utilizadas habitualmente en las definiciones de “enfermedad similar a la gripe” no se demostró en muchos de los estudios1-8. (calidad moderada)

Las definiciones de “enfermedad similar a la gripe” de la OMS9, los CDC10 y los ECDC11 tienen un rendimiento diagnóstico muy bajo. La definición de caso de “enfermedad similar a la gripe” de la OMS tiene la mayor especificidad (21,4%) y la de los ECDC la mayor sensibilidad (96,1%)8. El rendimiento es aún menor en los niños menores de 5 años. (calidad moderada)

Resumen de la evidencia:

Los objetivos de un diagnóstico de confirmación rápido de la gripe incluyen la reducción del número de pruebas de laboratorio complementarias y estudios de imagen solicitados, la reducción de la prescripción inadecuada de antibióticos, el uso de oseltamivir en las situaciones en que esté indicado y facilitar el aislamiento de los pacientes en cohortes.

La sensibilidad de los tests rápidos varía ampliamente dependiendo, entre otros factores, del tipo de test, de la muestra, la edad del paciente, el tiempo de evolución de la enfermedad y el periodo epidémico. Fuera de este periodo, cuando la prevalencia de la patología es baja, incluso con test con sensibilidad y especificidad muy elevadas, la mayoría de los resultados positivos serán falsos positivos.

La Asociación Americana de Pediatría recomienda realizar pruebas de diagnóstico rápido cuando los resultados estén disponibles a tiempo para influir la toma de decisiones clínicas o medidas para el control de la infección. Recuerda que, aunque se pueden tomar decisiones respecto al tratamiento y el control de la infección basadas en los resultados positivos de un test de antígeno rápido, los resultados negativos no deben utilizarse de la misma forma debido a su subóptima sensibilidad y los potenciales falsos negativos. Los resultados positivos de los tests rápidos sí serían útiles para reducir la solicitud de estudios adicionales y promover una adecuada política antibiótica13.

Por su parte, los CDC de Estados Unidos recomiendan hacer una prueba de diagnóstico rápido en todos los pacientes hospitalizados en los que se sospeche gripe. Sin embargo, también insisten en que la decisión de iniciar el tratamiento antiviral, si este se considera indicado, debe tomarse lo antes posible, sin esperar el resultado de la prueba. También aconsejan que las medidas para el control de la infección se tomen inmediatamente tras el ingreso del paciente en el que se sospeche gripe incluso aunque las pruebas rápidas sean negativas14.

**¿A quiénes deben de realizarse tests diagnósticos de la gripe?**

**¿Se deben realizar tests diagnósticos de la gripe en el ámbito extrahospitalario?**

Resumen de la evidencia:

La mayoría de los estudios se han realizado en el ámbito hospitalario. Existen dos estudios observacionales prospectivos realizados en Francia (calidad media-baja). En el primero16 se observa una disminución en la prescripción de antibióticos, ya de por sí baja en términos globales (3,9% en los niños a los que se hizo test rápido frente a 9,5% en los que no se realizó). El segundo estudio17, en el que se realizó test rápido para gripe a todos los niños con infección respiratoria febril, observa una disminución en la solicitud de pruebas de laboratorio y radiografías (0,7% frente a 11,6%), aumento en la prescripción de antivirales (64,7% frente a 0) y una menor prescripción de antibióticos (7,6% frente a 18,5%) en los niños con un test rápido positivo.

**¿Se deben realizar test diagnósticos de la gripe en el ámbito hospitalario?**

Resumen de la evidencia:

Una revisión Cochrane18 analiza 4 estudios (3 ensayos clínicos aleatorizados (ECA) y un quasi-ECA con 759 niños en el grupo en el que se realiza test rápido y 892 en el grupo control19-22. La calidad de los estudios es moderada. El uso de los tests rápidos resultó en una tendencia a un menor uso de antibióticos, pero el hallazgo no fue estadísticamente significativo. Se observó una menor frecuencia en la solicitud de radiografías de tórax (RR 0,77, IC 95% 0,65-0,91) en el grupo de tests rápidos. No se observó ningún efecto en el número de análisis de sangre o de orina ni en el tiempo de estancia en Urgencias.

Los autores concluyen que no hay suficientes pruebas para apoyar el uso de estudios virales rápidos para reducir el uso de antibióticos en los servicios de Urgencias Pediátricas. El uso de estos tests rápidos puede o no reducir el uso de antibióticos y la solicitud de otras pruebas en sangre orina. Estos estudios no tienen la potencia suficiente para resolver esta cuestión. Sin embargo, los tests virales rápidos reducen las peticiones de radiografías de tórax en Urgencias.

Otro estudio prospectivo, publicado antes de esa revisión Cochrane, pero no incluido en la misma, posiblemente por estar escrito en francés, incluye 177 niños de edades comprendidas entre 1 mes y 6 años atendidos en Urgencias; observa que en los niños con test rápido positivo se solicitaron menos estudios complementarios (17,3% frente a 35,3%); los resultados fueron estadísticamente significativos. No hubo diferencias en la frecuencia de prescripción de antibióticos23.

Posteriormente a la revisión Cochrane se ha publicado un nuevo estudio prospectivo, también realizado en Francia, que incluye 170 niños atendidos en Urgencias (57% con gripe, 8,8% con infección bacteriana grave). La estimación inicial por parte del médico de que el paciente presentase una infección bacteriana grave fue del 30,2%; tras conocer el resultado positivo del test esta disminuyó al 10% (- 36,6%). El tener un test positivo disminuyó la solicitud de pruebas de laboratorio (71,1% a 7,5%), de radiografía de tórax (64,4% a 25%), de análisis de orina (52,2% a 7,5%) y la prescripción de antibióticos (36,6% a 5%). La prescripción de oseltamivir fue muy baja en ambos grupos (5% en los niños con la prueba positiva y ninguno en los que la prueba fue negativa)24.

Varios estudios retrospectivos y observacionales posteriores, en general de baja calidad, obtienen resultados contradictorios25-33.

En resumen, existe información de calidad alta de que el uso de pruebas de diagnóstico rápido disminuye la realización de radiografías de tórax. Existe información de calidad baja que sugiere que el uso de estas pruebas puede disminuir la solicitud de otras pruebas de laboratorio y la prescripción de antibióticos.

No hay información de calidad que demuestre los beneficios de la realización de pruebas de diagnóstico rápido para el aislamiento de pacientes ingresados.

**¿Se deben realizar tests diagnósticos en la población de riesgo?**

Resumen de la evidencia:

Un estudio prospectivo (calidad moderada) realizado en dos hospitales de Bélgica, incluyendo a niños y adultos, analiza el impacto de la realización de un test rápido basado en amplificación isotérmica (Alere i Influenza A&B), con un tiempo de una hora para obtener el resultado, sobre el manejo de pacientes de alto riesgo34. Incluye 169 niños (51 menores de 3 meses, 34 con comorbilidad, 83 que precisaban ingreso independientemente de si tuviesen gripe o no, y 2 casos de infección nosocomial) y 84 adultos. Analizan cómo el resultado de la prueba influye sobre la tasa de hospitalización, la solicitud de otros estudios complementarios, el uso de antibióticos y de oseltamivir y la política de aislamiento. De las muestras pediátricas, 41 fueron positivas para el virus de la gripe. No describe por separado los resultados sobre el impacto en el manejo en los niños. Observa una disminución del 6% en la tasa de hospitalizaciones y del 29% en la solicitud de pruebas complementarias. Evitó o motivó el cese del tratamiento con antibióticos un 30.4% y motivó el uso de oseltamivir en el 50% de los casos (el otro 50% se había iniciado ya antes de conocer el resultado). También aumentó el número de aislamientos un 36.7%.

Se han descrito brotes nosocomiales de gripe en pacientes inmunodeprimidos35,36. En un brote en una unidad de Hematología/Oncología que afectó a 23 de 76 pacientes (32%), tres de ellos estaban infectados por una cepa resistente a oseltamivir35. En los pacientes inmunodeprimidos, se pueden utilizar las pruebas de detección rápida, pero, una vez tomadas las medidas oportunas de tratamiento antiviral y aislamiento, se debe ampliar el estudio para monitorizar la posible aparición de resistencias37.

**¿Cuáles son los tests diagnósticos de elección en pediatría?**

Resumen de la evidencia:

La sensibilidad y el valor predictivo de los criterios de diagnóstico clínico de gripe son variables. Además, en la edad pediátrica la presentación clínica es menos probable que sea típica, de manera que el valor predictivo positivo de la valoración clínica puede ser tan bajo como del 17% al 30%.

La confirmación en el laboratorio de la infección por virus de la gripe requiere el aislamiento del virus o la detección de proteínas o ARN virales en secreciones del tracto respiratorio u otras muestras.

El cultivo viral era clásicamente la prueba de referencia o *gold standard* para el diagnóstico de gripe. Sin embargo, requiere un tiempo de incubación prolongado (3 a 14 días) que incide en su utilidad clínica como herramienta de diagnóstico.

La confirmación en laboratorio no es necesaria para el tratamiento, pero el diagnóstico precoz de gripe permite reducir el uso inadecuado de antibióticos y que la opción de utilizar terapia antiviral cuando esté indicada resulte efectiva, además de suponer una medida importante para la prevención de la infección.

Las pruebas de diagnóstico de laboratorio pueden ser pruebas de detección antigénica o pruebas moleculares. Entre las pruebas de detección antigénica distinguimos los tests de diagnóstico rápido de gripe tradicionales por inmunocromatografía (TDRA) y las pruebas de inmunofluorescencia automatizadas, y entre las pruebas moleculares se incluyen las RT-PCR (singleplex y multiplex) y las pruebas moleculares rápidas.

Los tests de diagnóstico rápido de gripe tradicionales (TDRA), son fáciles de realizar y proporcionan resultados rápidos, pero pueden tener una sensibilidad subóptima. Las pruebas antigénicas negativas por tanto no excluyen la infección por virus de la gripe.

Los sistemas de detección antigénica mediante inmunofluorescencia automatizados parecen tener sensibilidades próximas a las pruebas moleculares, aunque se precisa una mayor experiencia clínica para confirmarlo.

Una revisión sistemática y metaanálisis reciente38 comparando los resultados de los tests de inmunofluorescencia automatizados con los obtenidos mediante reacción de cadena de polimerasa de transcriptasa inversa muestra que en niños las sensibilidades agrupadas para gripe A y B de los primeros (87,6% y 82.5%) y de los tests de amplificación rápida de ácidos nucleicos (90,2% y 95,9%) son similares y hacen que estos tests de nueva generación puedan considerarse muy aceptables para su empleo en la población pediátrica.

La sensibilidad de los tests de diagnóstico rápido de gripe tanto por inmunocromatografía como por inmunofluorescencia obtiene una puntuación aproximadamente un 15% mayor en niños que en adultos para gripe A y aproximadamente un 30% para gripe B, probablemente en relación con la diseminación más prolongada y abundante en los primeros.

En cualquier caso, la identificación de ARN viral no indica necesariamente replicación viral activa o viabilidad viral.

Las pruebas moleculares de detección rápida aprobadas por la FDA pueden dar resultados en 15-30 minutos o menos, pueden distinguir gripe A y B pero no sus subtipos, tienen una sensibilidad y especificidad equiparable a RT-PCR y algunas (2) están certificadas por la Clinical Laboratory Improvement Amendments (CLIA) para ser utilizados en los centros sanitarios.

Otras pruebas moleculares pueden ofrecer resultados en tiempos variables desde 45-80 minutos hasta varias horas, según cada prueba. Algunas pueden detectar y diferenciar las infecciones por virus de la gripe A y B; otras pueden identificar determinados subtipos de virus de la gripe A estacional, por ejemplo A(H1N1)pdm09 o A(H3N2), y también se dispone de pruebas aprobadas por la FDA que pueden detectar virus de la gripe y otros patógenos respiratorios.

El uso de paneles múltiplex para analizar muestras respiratorias para múltiples patógenos ha puesto de manifiesto la dificultad de evaluar la etiología de las infecciones respiratorias. Cuando se detectan múltiples patógenos, no está claro si un patógeno está causando la enfermedad o si colectivamente son responsables de la misma. Los virus detectados pueden ser la causa inmediata (p. ej., neumonía viral primaria), o no (por ejemplo, diseminación viral prolongada o infección incidental). Si bien se han encontrado muchos virus respiratorios, incluido gripe, en personas asintomáticas, la prevalencia del virus de la gripe suele ser más alta en casos que en controles. Además, el análisis de una sola muestra puede no identificar a un agente involucrado antes o después en el proceso de enfermedad. Los estudios que evalúan un solo virus o no incluyen controles comunitarios probablemente atribuyan erróneamente (y posiblemente sobreestimen) el número o la incidencia de la enfermedad causada por ese virus39.

Hay evidencia de calidad alta de que los test de diagnóstico rápido de gripe tradicionales (TDRA) en niños tienen una sensibilidad y especificidad subóptima como medio diagnóstico de gripe cuando se comparan con cultivo viral40.

Hay evidencia de calidad alta de que el valor predictivo positivo de las TDRA es mayor durante el periodo epidémico. Durante los períodos de baja actividad de la gripe, los resultados positivos deben interpretarse con precaución y valorar su confirmación mediante cultivo viral41.

Hay evidencia de calidad alta38 de que los nuevos tests de inmunofluorescencia automatizada y los tests rápidos de amplificación de ácidos nucleicos tienen mucha mayor sensibilidad para gripe A y B que las TDRA tradicionales con similar especificidad.

Desde el pasado 12 de enero de 2018, la FDA exige a los fabricantes de TDRA que demuestren una sensibilidad clínica mínima de al menos 80%, con un límite inferior del 70% del intervalo de confianza (IC) del 95% frente a un comparador RT-PCR.

Las nuevas pruebas de diagnóstico rápido de gripe basadas en ampliación de ácidos nucleicos ofrecen resultados en <15-20 minutos, tienen una sensibilidad muy mejorada incluso en comparación con el cultivo, y permiten el inicio precoz de tratamiento antiviral cuando se considere indicado, por lo que, junto con los tests de inmunofluorescencia, que son más baratos, se están convirtiendo en los métodos de elección para el diagnóstico de gripe especialmente en la edad pediátrica. En un estudio realizado utilizando como único test diagnóstico una prueba de detección de ácidos nucleicos (Alere®) mostró disminución de los costes42.

**¿Cuándo y cómo debe hacerse la recogida de la muestra?**

Resumen de la evidencia:

La diseminación del virus de la gripe en las vías respiratorias superiores de la mayoría de los pacientes que no presentan complicaciones se reduce considerablemente alrededor de los 3 a 4 días del inicio de la enfermedad. Para maximizar la detección del virus de la gripe, se deberían tomar muestras respiratorias lo más cerca posible del momento del comienzo de la enfermedad (preferiblemente dentro de los 3-4 días después de su inicio); aunque las pruebas moleculares pueden detectar virus de la gripe en muestras de vías respiratorias por periodos más largos. Los lactantes e inmunodeprimidos de cualquier edad pueden tener replicación viral por períodos más prolongados.

La muestra apropiada (ej. lavado, aspirado o cepillado/frotis nasofaríngeo; frotis nasal, frotis orofaríngeo o secreciones respiratorias bajas) depende de la prueba seleccionada.

Los frotis nasofaríngeos tienen generalmente mayor rendimiento que las muestras de frotis nasal o de orofarínge. Entre las muestras respiratorias preferibles para las pruebas del virus de la gripe se incluyen también el frotis nasal, y el lavado y aspirado nasal. Los frotis nasofaríngeos y de orofaringe combinados permiten una mayor detección de virus de la gripe que con un solo tipo de muestra.

Debido a que las muestras de vías respiratorias recomendadas varían entre las diferentes pruebas de gripe aprobadas por la FDA, se debe consultar la ficha técnica aprobada específicamente para cada prueba.

En pacientes hospitalizados con sospecha de gripe se recomienda realizar pruebas moleculares que además permitan detectar subtipos virales en orden a optimizar las prácticas de aislamiento para el control de la infección hospitalaria. En casos de enfermedad grave con afectación de vías respiratorias inferiores e insuficiencia respiratoria que precise de asistencia respiratoria mecánica invasiva  en los que los resultados de las pruebas obtenidas con muestras de vías respiratorias superiores fueron negativos, se deben realizar pruebas de gripe mediante RT-PCR u otras pruebas moleculares en muestras de vías respiratorias inferiores (aspirado endotraqueal o lavado broncoalveolar) ya que en estos casos la replicación viral en vías inferiores puede detectarse por periodos más prolongados. Los pacientes inmunosuprimidos y aquellos que reciben corticoesteroides sistémicos pueden tener también diseminación prolongada del virus de la gripe en sus vías respiratorias inferiores43.

Los CDC recomiendan muestras nasofaríngeas para detectar ARN mediante RT-PCR por su mayor sensibilidad cuando se compara con muestras nasales u orofaríngeas.

Existe evidencia moderada de calidad media de que en general las muestras nasofaríngeas o nasales combinadas con muestras de orofaringe son más efectivas que el frotis orofaríngeo único para el aislamiento viral o la detección rápida44.

Existe evidencia baja de calidad media de que el frotis de cornete medio pueda ser aceptable para las pruebas moleculares.

En muestras de 484 pacientes de servicios de urgencias, los frotis de cornete medio tuvieron una sensibilidad del 98% (95% CI 94-100) y provocaron menos molestias que el frotis nasofaríngeo de referencia estándar45.

Hay evidencia alta de que las muestras de aspirado nasofaríngeo de calidad, que por lo tanto presenten suficiente número de células epiteliales, y que sean transportadas en medio para virus obtienen mejores resultados

Hay evidencias de calidad baja/moderada en estudios realizados en servicios de urgencias de que el frotis en cornete medio provoca menos molestias que el frotis nasofaríngeo con sensibilidad similar para RT-PCR en niños y adultos.

Las muestras de frotis de cornete medio para pruebas moleculares podrían suponer una opción para la autorrecolección o la recolección parental, reduciendo la posibilidad de extensión de la infección a los proveedores de cuidados de salud.

Las muestras para pruebas de gripe deben ser transportadas en hielo y refrigeradas.

**SOBRE OBJETIVOS DEL TRATAMIENTO:**

**¿Cuál es el objetivo que se persigue con el tratamiento? ¿Se debe utilizar oseltamivir con los siguientes objetivos?**

**1. Reducir la duración de los síntomas**

1.1 Resumen de la evidencia

Evaluamos dos estudios en el paciente hospitalizado:

- Un estudio[[1]](#endnote-1) observacional multicéntrico, retrospectivo, en hospitalizados con gripe confirmada (287 pacientes, 32% tratados con oseltamivir, con el único criterio de si su médico lo indicaba), sin enfermedades de base excepto asma, no encuentra diferencias significativas ni en los días de fiebre ni en los días de requerimientos de oxígeno en los pacientes tratados con oseltamivir frente a los no tratados. La calidad del estudio es baja y, dado su carácter retrospectivo, el hecho de que la indicación de oseltamivir no tiene ningún criterio definido y pueden existir sesgos de selección, la certeza de evidencia que genera es muy baja46.

- En un estudio observacional unicéntrico español, prospectivo, realizado entre 2008-2015, encuentran que sólo entre el 5-12% (según el año) de los casos de pacientes ingresados con infección respiratoria (1612 menores de 14 años) tenían gripe. La calidad del estudio es baja47.

Encontramos más estudios en el paciente extrahospitalario:

- En un ensayo clínico aleatorizado, doble-ciego, en Bangla-Desh (mayo 2008-diciembre 2010), comparando oseltamivir frente a placebo en 1190 niños, previamente sanos, contactos con enfermos de gripe, de 1 a 18 años, todos documentados microbiológicamente, tratados en los 5 primeros días desde el comienzo de la clínica, se acortó significativamente la mediana de duración de los síntomas en un día (3 días, IQR 1-5 vs 4 días, IQR 1-6; p=0,01). La calidad del estudio es alta, y la certeza de la evidencia generada es alta48.

- En un ensayo clínico en niños previamente sanos (669) aleatorizados a oseltamivir vs placebo se redujo una media de 29 horas (12-47) la duración de los síntomas. La calidad de este estudio es alta y la certeza de la evidencia generada es alta49.

- En un ensayo clínico aleatorizado en USA y Canadá, en 452 niños previamente sanos, aleatorizados a recibir oseltamivir en las 48 horas siguientes al inicio de los síntomas frente a placebo, se redujo significativamente la mediana de duración de los síntomas en 36 horas y la progresión a otitis media aguda del 12 al 21% (reducción del 44%). La calidad del estudio es alta y la certeza de la evidencia generada es alta50.

- En un ensayo clínico en Finlandia, con niños de 1 a 3 años, se aleatorizaron 98 pacientes, 37 a oseltamivir en las primeras 24 horas del comienzo de los síntomas y 61 a placebo, con gripe documentada microbiológicamente y con sólo un paciente con asma por rama. Sólo en el caso de gripe A se redujo significativamente la duración de los síntomas en una mediana de 3 días con oseltamivir frente a 6,5 días con placebo y una reducción del 85% de la progresión a otitis media aguda. La calidad del estudio es alta, pero la certeza de la evidencia generada es moderada por inconsistencia en la aleatorización, y un número escaso de pacientes incluidos51.

- Dos estudios en niños con asma y gripe, documentada microbiológicamente, que suman 660 pacientes, no mostraron ningún acortamiento en la duración de los síntomas con el uso de oseltamivir frente a placebo. Se observó un aumento en la media de duración de los síntomas de 5,2 horas (IC 95% desde 11 horas por debajo a 21 horas por encima). La calidad de los estudios es alta y la certeza de la evidencia también es alta en contra del acortamiento de los síntomas en los niños tratados con oseltamivir que tienen asma49.

1.2 Evaluación del riesgo-beneficio

El perfil de seguridad de oseltamivir en niños es bueno. Los efectos secundarios graves, psiquiátricos, renales, son casos muy aislados, y los efectos secundarios frecuentes, vómitos fundamentalmente, son considerados tolerables, por lo que el riesgo-beneficio en la literatura, va a favor del beneficio, si un acortamiento discreto en la duración de los síntomas se considerara un beneficio real49.

1.3. Aspectos económicos

No existen estudios que evalúen la eficiencia de la utilización de oseltamivir en la población pediátrica. No está calculado el beneficio económico que supondría la disminución del número de horas de trabajo perdidas por los cuidadores de los niños si estos tienen un día menos de síntomas. La reducción discreta de horas de síntomas, que podría suponer alguna utilización menor de recursos sanitarios en régimen ambulatorio, no impresiona, subjetivamente, de reducir en forma importante los costes que supondrían la utilización de antiviral en toda la población, pero esto tampoco ha sido calculado por nadie.

**2. Reducir la mortalidad**

2.1 Resumen de la evidencia

- En un meta-análisis de datos individuales de múltiples centros en pacientes hospitalizados con infección por H1N1pdm09, se observó una menor mortalidad en los pacientes que recibieron tratamiento antiviral (OR=0,81, IC95%: 0,70-0,93). Sin embargo, este efecto protector perdía la significación entre la población pediátrica, 9218 menores de 16 años (OR=0,82, IC95%: 0,58-1,17). Sin embargo, la mortalidad en población pediátrica (0,03%) fue 4 veces inferior a la observada en adultos lo que hace que, a pesar de que la calidad del estudio sea aparentemente alta, la certeza de la evidencia que genera es muy baja (observacional, sin homogeneidad en los criterios de tratamiento, sin ajustar por factores de riesgo)52.

- En otro meta-análisis de datos individuales de múltiples centros (estudio observacional) hecho en pacientes pediátricos y adultos con neumonía y H1N1pdm09, se observó una menor mortalidad en los pacientes que recibieron tratamiento antiviral (OR=0,62, 0,40-0,96), especialmente si éste se iniciaba de forma precoz.Sin embargo, la certeza de la evidencia generada es muy baja al ser un estudio observacional, sin homogeneidad en los criterios de tratamiento, ni corrección por edad, ni factores de riesgo53.

- En un estudio observacional multicéntrico que incluye 784 menores de 18 años ingresados en cuidados intensivos con enfermedad grave principalmente (90%) por H1N1pdm09 no se observó una reducción de la mortalidad en los que recibieron tratamiento (OR 0.7, IC95% 0,3-1,4). Sin embargo, en un modelo multivariante en el que también se incluye la necesidad de ventilación mecánica, comorbilidad según los criterios americanos del Advisory Committee on Immunization Practices (ACIP), y neumonía, sí se observa una reducción de mortalidad (OR=0,4, 0,2–0,8). La precocidad del tratamiento se asoció a una menor mortalidad. La calidad del estudio es baja por ser observacional, y la certeza de la evidencia generada es muy baja al no existir homogeneidad en los criterios de tratamiento54.

2.2 Evaluación del riesgo-beneficio

No existe ningún estudio que evalúe esta perspectiva. Sin embargo, la utilización de oseltamivir en pacientes ingresados con neumonía o ingresados en la unidad de cuidados intensivos puede tener una justificación positiva a favor del beneficio bajo esta perspectiva (leves efectos secundarios tras una experiencia clínica significativa**¡Error! Marcador no definido.**9) en comparación con un potencial beneficio (el desenlace de interés evaluado es la mortalidad) aunque la evidencia sea de calidad muy baja. No existe otra alternativa de tratamiento con similar evidencia, aunque es observacional. Un informe de los ECDCs de un grupo de expertos recomienda el uso de antivirales con este fin en el paciente pediátrico hospitalizado con gripe bajo una perspectiva de riesgo-beneficio55.

2.3 Aspectos económicos

No se evalúan por falta de estudios.

**3. ¿Es eficaz en la disminución de ingresos en UCIP?**

3.1 Resumen de la evidencia

- En un meta-análisis de datos individuales (observacionales) de múltiples centros hecho en pacientes de todas las edades que requieren ingreso con H1N1pdm09, se observó que existía una mayor incidencia de efectos graves (necesidad de cuidados intensivos y mortalidad) en los pacientes que recibieron oseltamivir OR=1,76 (IC95%: 1,22–2,54). Esta observación puede reflejar el mayor uso de antivirales en pacientes graves. El mismo estudio constata que esta incidencia de complicaciones fue menor en los pacientes que recibieron oseltamivir de forma precoz (OR=0,41, 0,30-0,56). La calidad del estudio es baja por ser observacional, además no existe homogeneidad en los criterios de tratamiento, ni corrección por edad, ni factores de riesgo pediátricos, lo que hace que la certeza de la evidencia generada sea muy baja56.

- En un estudio observacional multicéntrico en el que se incluyen 18657 pacientes pediátricos ingresados, se observa una menor incidencia de necesidad de ventilación mecánica durante el ingreso en los pacientes que recibieron oseltamivir, tanto en subtipos estacionales (OR=0,66, 0,45-0,97) como para H1N1pdm09 (OR=0,23, 0,16-0,34). Los datos se ajustan en un modelo multivariante que incluye potenciales factores confusores (edad, comorbilidad, sobreinfección bacteriana). La calidad del estudio es baja al ser observacional, así como la certeza de la evidencia generada57**.**

- En un estudio observacional pediátrico de un centro español, en el que se incluían 127 niños ingresados durante la pandemia de 2009, se observó un aumento de incidencia en la necesidad de cuidados intensivos en aquellos pacientes en los que se retrasó el inicio de oseltamivir más de 72 horas desde el inicio de los síntomas (OR=3,7, IC95%: 1,1–11,7). Esta observación se realiza en un modelo multivariante tras ajustar por comorbilidad, sobreinfección bacteriana y edad. La calidad y la certeza de la evidencia generada son bajas al ser un estudio observacional58**.**

3.2 Evaluación del riesgo-beneficio

La evidencia existente es baja y principalmente fundamentada en los datos de la pandemia de 2009. Dado que requerir cuidados intensivos o ventilación mecánica se considera un desenlace de interés clave, puede existir una justificación para el uso de oseltamivir con este propósito en determinadas poblaciones de riesgo o situaciones que en estudios observacionales se han visto asociadas a una mayor gravedad (como la presencia de neumonía o tener una comorbilidad neurológica de base o cardiopatía 57, 59, 60). No existe literatura que evalúe el riesgo-beneficio dirigido a este evento clave.

3.3 Aspectos económicos

No existe literatura que lo evalúe.

**4. Reducir la tasa de hospitalización:**

4.1.- Resumen de la evidencia

- En un meta-análisis que incluye 3 estudios, con 1359 niños tratados o no tratados con antivirales, no hubo diferencias significativas en las tasas de hospitalización (RR 1,92, 95% CI 0,70 to 5,23). La calidad del estudio es alta y la certeza de la evidencia que genera también lo es49.

- En otro estudio, observacional, retrospectivo61, realizado a partir de datos de las aseguradoras de USA, de 2006 a 2010 que incluye la pandemia de 2009, se comparan los datos de menores de 18 años con diagnóstico clínico de gripe.Se usó terapia antiviral en 315.128 niños y adolescentes (40% de los casos). La terapia antiviral redujo el número de hospitalizaciones de manera significativa en el grupo total (OR 0,69, IC95% 0,66-0,73, más aún si se empleaba en las primeras 48 horas de los síntomas (OR 0,4, IC95% 0,12-0,16). Se analizó un subgrupo de menores de 1 año, en los que la diferencia en la tasa de hospitalización entre tratados y no tratados no fue significativa (OR 0,82, IC95%, 0,53-1,28). Si se consideraba el momento del inicio del tratamiento, si era menor de 48 horas del inicio de los síntomas, sí reducía la tasa de hospitalización de los menores de un año (OR 0,13, IC95%, 0,13-0,13). La calidad del estudio es muy baja por sus limitaciones: carácter retrospectivo, no estar basado en diagnóstico microbiológico cierto, no definir los criterios de terapia antiviral. La certeza de la evidencia que genera es muy baja.

4.2 Evaluación del riesgo-beneficio

No existen estudios en este sentido, pero la evidencia de beneficio es baja o nula, por lo que, a pesar de ser seguro para el paciente, el riesgo de aparición de resistencias, desaconseja el empleo de oseltamivir para este fin.

4.3. Aspectos económicos

La escasa o nula utilidad del tratamiento para reducir hospitalizaciones hace ineficiente esta medida terapéutica.

**5 .Reducir la duración de la hospitalización:**

5.1 Resumen de la evidencia

Un estudio comparativo multicéntrico, retrospectivo, en niños hospitalizados no encuentra diferencia en los días de ingreso entre los tratados con oseltamivir frente a los no tratados. La calidad del estudio es baja por su carácter observacional y la certeza de la evidencia generada es muy baja al no haber asignación con criterio definido del tratamiento46.

5.2 Evaluación del riesgo-beneficio

Como ocurre con el punto anterior la evidencia de beneficio es baja o nula, por lo que, a pesar de ser seguro para el paciente, el riesgo de aparición de resistencias, desaconseja el empleo de oseltamivir para este fin.

5.3. Aspectos económicos

La escasa o nula utilidad del tratamiento para acortar estancias hace ineficiente esta medida terapéutica.

**6.Reducir o prevenir las complicaciones pulmonares**:

6.1 Resumen de la evidencia

- Un meta-análisis de tres ensayos clínicos aleatorizados pediátricos en el que se incluyen 677 niños tratados con oseltamivir y 682 con placebo, no concluye diferencias en la incidencia de neumonía entre el grupo tratado y el grupo control (RR 1,06, IC95%:0,62-1,83). Tampoco concluye diferencias en el diagnóstico de bronquitis (RR 0,65, IC95%: 0,27-1,55). A pesar de ser ensayos clínicos cuya calidad es alta, ninguno de ellos fue diseñado para evaluar diferencias entre grupos en estos eventos clínicos, lo que menoscaba a baja la certeza de la evidencia que generan49.

- En un meta-análisis de datos individuales de múltiples centros (datos observacionales) en el que se incluyen 8765 niños menores de 16 años con infección por el subtipo H1N1pdm09, se observan diferencias en el diagnóstico de neumonía entre pacientes que recibieron tratamiento antiviral y los que no (OR 1,41, 1,18-1,69). Los autores concluyen que podría existir un sesgo al ser más probable que recibieran tratamiento los niños con enfermedad más grave, y realizan un análisis comparativo sólo entre los que recibieron tratamiento, detectando una reducción del riesgo en el diagnóstico de neumonía entre los pacientes que recibieron tratamiento en los primeros dos días de clínica respecto a los que lo recibieron después (OR 0,43, 0,35–0,53). La certeza de la evidencia generada es muy baja, por ser un meta-análisis basado en datos observacionales sin homogeneidad en los criterios de tratamiento53**.**

- En un estudio observacional multicéntrico español pediátrico, no se observan diferencias en la incidencia de neumonía entre pacientes tratados con oseltamivir y pacientes que no recibieron tratamiento (24/93 vs 43/194). La calidad del estudio es baja por su carácter observacional, y la certeza de la evidencia generada es muy baja dado el bajo número de pacientes y la falta de homogeneidad en la tipología de paciente incluido y los criterios de tratamiento46.

6.2. Evaluación del riesgo-beneficio

No existen estudios que evalúen este aspecto. Sin embargo, dado que presentar una neumonía por gripe no se considera un desenlace de interés clave y la evidencia existente al respecto a favor del tratamiento antiviral es de muy baja calidad, sería poco justificable el uso de tratamiento antiviral con el objetivo de disminuir este evento.

6.3 Aspectos económicos

No existen estudios que evalúen directamente los costes económicos del uso del oseltamivir con el objetivo de disminuir las complicaciones pulmonares. Sin embargo, existe un estudio observacional hecho con 116 niños menores de 16 años en el que el inicio del oseltamivir más allá de las primeras 72 horas de ingreso se asoció a un incremento de un 61% (IC95% 33-95) del coste del ingreso, en comparación a los pacientes que lo recibieron desde el inicio. La certeza de la evidencia generada es muy baja al no objetivarse los criterios de tratamiento, pero a pesar de ello, los autores aportan una reflexión interesante y que hace referencia al hecho de que el uso de oseltamivir puede reducir los costes asociados a la prescripción de tratamiento antibiótico por una eventual neumonía o el coste de las pruebas de diagnóstico en niños que ingresan con gripe62.

**7. Reducir o prevenir las complicaciones extrapulmonares:**

7.1 Resumen de la evidencia:

- En un meta-análisis de tres ensayos clínicos pediátricos, no se concluyen diferencias en la incidencia de otitis media en el grupo tratado y el grupo control (RR 0,80, IC95%:0,62-1,02). Tampoco concluyen diferencias en el diagnóstico de sinusitis (RR 1, IC95%: 0,58-1,72). Se trata de un estudio de calidad alta, en el que la ausencia de la edad como confusor en el análisis (ya que la otitis media es más frecuente en lactantes) hace que la certeza de la evidencia generada sea moderada, ya que se puede infraestimar el potencial efecto beneficioso en rangos de edad donde la patología es más frecuente49.

- En un meta-análisis que incluye dos ensayos clínicos pediátricos se observa una reducción en la incidencia de otitis media en el grupo que recibe tratamiento con oseltamivir. Entre 1 y 5 años (273 niños) hay una diferencia de riesgo en favor del tratamiento de -0,14, IC95%: -0,24 a -0,04; y en niños de 1 a 12 años de edad (816 niños), de -0,09, IC95%:-0,16 a -0,03. En uno de estos ensayos este beneficio se observa a expensas de los pacientes que fueron tratados muy precozmente (primeras 12 horas), y en el otro un efecto más beneficioso en los menores de 5 años, ya que la tasa de OMA en mayores de 5 años es muy baja. La calidad de los estudios es alta y la certeza de la evidencia generada también63.

- En un ensayo clínico aleatorizado con pacientes principalmente pediátricos no se observaron diferencias en la incidencia de otitis media entre pacientes que recibieron tratamiento y pacientes que no lo recibieron, aunque la incidencia de otitis media en este estudio fue muy baja en ambas ramas (7/396 vs 6/398, p=0.5). La calidad del estudio es alta, pero la incidencia baja de enfermedad y, de nuevo, el hecho de no incluir la edad como variable confusora que infraestima el efecto en una población más susceptible –lactantes- hace que la certeza de la evidencia generada sea baja48.

- Finalmente, en un meta-análisis muy reciente de diversos ensayos clínicos pediátricos, que incluyen los estudios pediátricos referenciados en los meta-análisis anterioresy el estudio anteriormente citado48**.**, se detectan diferencias en la incidencia de otitis media en el grupo tratado y el grupo placebo (RR 0,66, 0,47-0,95). La calidad del estudio es alta, pero de nuevo, el análisis del problema unificando todos los rangos de edad hace que la certeza de la evidencia generada sea moderada64**.**

- No existe ningún tipo de evidencia sobre la efectividad del oseltamivir para la prevención de otras complicaciones extrapulmonares frecuentes como la miositis, ni complicaciones extremadamente más infrecuentes como miocarditis o encefalitis.

7.2 Evaluación del riesgo-beneficio

El desarrollo de una otitis media aguda o una sinusitis en la gripe no se considera un desenlace de interés clave, salvo que de su diagnóstico se derive la utilización de la antibioterapia, práctica habitual, aunque no completamente justificada pues, en la mayor parte de las ocasiones será un signo de la enfermedad viral y no una complicación bacteriana. No existe literatura dirigida al ahorro de antibióticos si la otitis media se presenta, pero, podemos subjetivamente pensar que en nuestro medio su diagnóstico implique un uso elevado de antibióticos, por lo que la disminución de este evento en algunos casos, podría ser beneficiosa.

7.3 Aspectos económicos

No existen datos para su evaluación. El número de pacientes que se deberían tratar para evitar la progresión de la enfermedad a otitis media aguda probablemente sea alto para considerar eficiente la medida.

**SOBRE EL TRATAMIENTO CON OSELTAMIVIR: ¿A quién debe ofrecerse tratamiento?**

**¿Se****debe ofrecer tratamiento antiviral a la población general?**

Resumen de la evidencia

Hay información de calidad alta (EECC, Cochrane) que informa de que el oseltamivir iniciado en las primeras 24 horas de enfermedad puede tener un efecto beneficioso en la reducción en días de enfermedad en todos los grupos de edad (3.5 días si se inicia en las primeras 24 horas en niños de 1 a 3 años, 12 a 47 horas en las primeras 48 horas)48,49,51 . Este efecto se da en niños previamente sanos. No se encontró este efecto con zanamivir.

Es importante resaltar que este beneficio en los síntomas estaba ausente en los niños con asma.49

Hay artículos de calidad moderada-alta que sugieren una disminución en la incidencia de otitis media en niños de 1 a 3 años cuando se comienza el tratamiento en las primeras 12-24 horas de enfermedad51. Sin embargo, los metaanálisis no confirman este beneficio, y sugieren que el diagnóstico de la otitis en dichos estudios podría no ser suficientemente fiable.

La información que sugiere que el uso de oseltamivir podría disminuir la tasa de ingresos y complicaciones es de calidad baja61,65,66.

Como se ha referido en el apartado relativo a objetivos del tratamiento, hay información tanto de calidad alta como de calidad baja que generan una certeza moderada en el sentido de el oseltamivir no aporta beneficios significativos en cuanto a hospitalización, neumonía, complicaciones pulmonares ni otras complicaciones graves en los niños con gripe atendidos de forma ambulatoria. No hay estudios que apoyen su utilización para prevenir complicaciones pulmonares o extrapulmonares al margen de la otitis media49. La información al respecto de la reducción de mortalidad en pacientes graves no es concluyente. 52-54

Por último, la mayoría de los ensayos y muchos de los estudios observacionales han sido financiados por los fabricantes, y muestran un alto riesgo de sesgos.1 Además, hay datos de que las publicaciones son selectivas.

Evaluación Riesgo / Beneficio

El beneficio del tratamiento en términos de salud es limitado. Una proporción de pacientes tendría efectos colaterales (vómitos, psiquiátricos).49,67 Hay un riesgo teórico de desarrollo de resistencia, y no hay ninguna alternativa eficaz de forma oral. El potencial beneficio de ahorro antibiótico por prevención de otitis (suponiendo que sean bacterianas) se contrarrestaría por el uso generalizado del antiviral, y no está claro cuál de los dos consumos es más perjudicial.

Aspectos económicos

El coste económico de tratar a toda la población con gripe o con sospecha de gripe sería elevado. El potencial ahorro antibiótico no está calculado.

Otros aspectos

La proporción de niños que pueden ser diagnosticados con certeza de gripe en las primeras 24 o 48 horas de enfermedad es baja. No es una práctica recomendada que los niños con fiebre y buen estado general sean evaluados el primer día de fiebre. Los centros de salud y los servicios de urgencias no suelen disponer de técnicas de diagnóstico rápido de alta sensibilidad y especificidad.

**¿Se debe ofrecer tratamiento a todos los pacientes hospitalizados sin factores de riesgo?**

Resumen de la evidencia

Hay información de alta calidad que informa de que tratamiento antiviral no disminuye la mortalidad ni las complicaciones graves en los pacientes hospitalizados con gripe y/o complicaciones asociadas68. Los ensayos clínicos de alta calidad no han demostrado que el oseltamivir sea beneficioso en niños en ninguna de las variables de mayor interés (mortalidad, complicaciones, estancia hospitalaria)54.

Hay estudios retrospectivos que sugieren ausencia de beneficio en niños previamente sanos y asmáticos hospitalizados tratados con oseltamivir46.

Hay información de calidad moderada/baja que sugiere que los pacientes críticamente enfermos con ventilación mecánica pueden tener menor mortalidad cuando son tratados con oseltamivir en las primeras 24 horas46. Hay información de baja calidad y con riesgo de sesgos que sugiere menor mortalidad en pacientes (adultos y menores de 16 años agrupados, no se aportan datos de niños por separado) con gripe y neumonía tratados en las primeras 48 horas46.

Evaluación Riesgo/Beneficio.

El beneficio del tratamiento en los pacientes hospitalizados es bajo. Una proporción de pacientes tendría efectos colaterales (vómitos). Hay un riesgo teórico de desarrollo de resistencia, y no hay ninguna alternativa eficaz de forma oral, y solo una (zanamivir) de forma intravenosa.

En cuanto a los pacientes críticos y con neumonía grave, dada la relevancia de la variable “mortalidad”, el beneficio podría ser mayor que el riesgo, por lo que la información se tiene en cuenta para las recomendaciones, aunque la evidencia a favor del tratamiento es de baja calidad.

Un dato a favor de tratar a este tipo de pacientes es la reducción de eliminación del virus en unidades de alta complejidad. El perfil de seguridad es bueno a partir de las 2 semanas de vida.

Aspectos económicos

El coste económico de tratar a todos los niños hospitalizados con gripe o con sospecha de gripe sería relativamente elevado. El coste de tratar solo a los pacientes críticos probablemente no sería elevado. No hay información de calidad al respecto.

Otros aspectos

La situación de tener un paciente crítico en las primeras 24-48 horas de enfermedad se da en pocas ocasiones en la vida real. El zanamivir intravenoso (iv) tiene buen perfil en niños críticos69.

**¿Debe ofrecerse tratamiento antiviral a la población con factores de riesgo?**

**(inmunodeprimidos, enfermedad pulmonar crónica diferente al asma, cardiopatías hemodinámicamente significativas, patología neurológica grave, nefropatías y hepatopatías crónicas)?**

Resumen de la evidencia

- La recomendación general por parte de los organismos tanto europeos (ECDC55) como estadounidenses (CDC70) es de tratar a las personas de alto riesgo, teniendo en cuenta la enfermedad de base y su severidad, la edad, el tiempo de evolución de la gripe…

- Sin embargo, la evidencia es limitada y son recomendaciones basadas en la experiencia clínica y argumentando que no existe otro tratamiento disponible. Además, la mayoría de los ensayos han sido financiados por las casas comerciales, con el riesgo de sesgos que este hecho conlleva.

- No se dispone de evidencia de que el tratamiento con inhibidores de la neuraminidasa en grupos de riesgo, vacunados o no, suponga un beneficio en términos de mortalidad u hospitalización. (calidad alta).

- Aunque se han descrito efectos positivos en el tratamiento de niños asmáticos con gripe (reducción de los síntomas gripales en horas, disminución de las reagudizaciones asmáticas en la siguiente semana (51% vs 68%, p 0,03) (observacional, calidad baja), revisiones sistemáticas posteriores 64,71 no encuentran beneficio en el tratamiento de niños asmáticos con gripe confirmada por laboratorio (calidad alta, metanálisis y RS Cochrane).

- Existen pocos estudios realizados sólo en niños, de manera que con frecuencia los datos se ofrecen conjuntamente con población adulta, y no se estratifican en población sana y población de riesgo. Salvo lo indicado para asma, no hay estudios de calidad en otros pacientes de riesgo, menos aún pacientes pediátricos.

Evaluación del riesgo-beneficio

- La falta de datos en pacientes de riesgo y el beneficio discreto encontrado en pacientes sanos (no disminuye mortalidad ni necesidad de ingreso), la necesidad de iniciar el tratamiento antes de 48 horas del establecimiento de los síntomas, la posible aparición de resistencias y la posibilidad de efectos secundarios (vómitos en el caso de los niños) hace que más que indicar tratamiento en todos los casos, debamos valorarlo de manera individualizada, teniendo en cuenta la enfermedad subyacente, su severidad y evolución, el tratamiento de base, la edad, etc. (calidad alta, metanálisis y RS Cochrane).

Aspectos económicos

- El uso de oseltamivir como tratamiento en la población de riesgo en términos de coste-efectividad es favorable, si bien los datos nuevamente son indirectos y poco consistentes 55 (calidad baja).

**¿Se debe administrar quimioprofilaxis para prevenir la gripe? ¿Qué pacientes son susceptibles de quimioprofilaxis para prevenir la gripe?**

Resumen de la evidencia

- Tanto ECDC como CDC recomiendan profilaxis en pacientes de riesgo, especialmente en no vacunados o en inmunodeprimidos 55,70 (opinión de expertos, calidad baja). No obstante, los ensayos existentes presentan fallos metodológicos, por lo que no se pueden extraer conclusiones/recomendaciones al respecto (calidad alta, Cochrane)49.

- Oseltamivir y zanamivir reducen el riesgo de gripe sintomática en contactos, el número necesario a tratar para obtener un beneficio (NNTB) fue = 33 (26 to 55) y 51 (40 to 103) respectivamente, no de gripe no sintomática ni de cuadros “gripe-like”6. De hecho, la FDA no reconoce efecto sobre la transmisión de la gripe persona a persona.

- El beneficio de la profilaxis con NI es modesto, con una disminución del 8% de riesgo de enfermar en convivientes de un caso (CI 95% 0,12-0,05, p<0.001) (calidad baja, revisión sistemática pero sólo de ensayos publicados, con grupos pequeños y heterogéneos)55.

- En adultos y adolescentes de riesgo (≥12 años), la profilaxis con zanamivir durante 28 días tuvo una eficacia del 83% (95% CI 56-93) (calidad moderada), RAR 4% (95% CI 1,6-4,4)55.

Evaluación riesgo- beneficio.

- La vacunación antigripal y medidas como lavado frecuente de manos y uso de mascarillas son los pilares principales de la prevención de la gripe, más apropiados y efectivos que el uso de antivirales, también en población de riesgo (calidad alta,RS , Cochrane) 55,71.

- Se debe valorar profilaxis en pacientes de alto riesgo, de forma individualizada, especialmente cuando la vacunación no se haya realizado -o no hayan transcurrido 14 días desde la misma- o bien sea poco eficaz y el contacto con personas con gripe no pueda ser evitado55,71.

- Si se indicase, se recomienda iniciar oseltamivir precozmente (antes de pasadas 48 horas de la exposición) y durante 10 días tras el último contacto confirmado conocido77, pudiéndose prolongar en niños no vacunados.

- En muchas ocasiones, instruir a los familiares de los niños con factores de riesgo para gripe complicada sobre los síntomas y signos de la misma, instándoles a consultar precozmente para permitir un diagnóstico, control y eventual tratamiento precoz es una buena opción77.

Otros aspectos

- Si la vacunación antigripal es una medida preventiva con evidencia en pacientes de riesgo, y la tasa de vacunación en enfermos crónicos ronda el 50%55,78, parece difícil implementar otra medida, la profilaxis, que requiere diagnóstico de laboratorio del caso e inicio precoz del antiviral, con pautas de 10 días para oseltamivir y más prolongadas en el caso del zanamivir. El NNTB es alto y no existe, al menos por el momento, suficiente evidencia a favor.

BIBLIOGRAFÍA

1. Peltola V, Reunanen T, ZiegleR T, Silvennoinen H, Heikkinen T. Accuracy of clinical diagnosis of influenza in outpatient children. Clin Infect Dis. 2005; 41: 1198-1200.
2. Silvennoinen H, Peltol a V, Lehtinen P, Vainionpää R, Heikkinen T. Clinical presentation of influenza in unselected children treated as outpatients. Pediatr Infect Dis J. 2009; 28: 372-375.
3. Heinonen S, Peltola V, Silvennoinen H, Vahlberg T, Heikkinen T. Signs and symptoms predicting influenza in children: a matched case-control analysis of prospectively collected clinical data. Eur J Clin Microbiol Infect Dis. 2012; 31: 1569-1574.
4. Silvennoinen, Peltola V, Vainionpää R, Ruuskanen O, Heikkinen T. Admission diagnoses of children 0–16 years of age hospitalized with influenza. Eur J Clin Microbiol Infect Dis. 2012; 31:225–231.
5. Friedman MJ, Attia MW. Clinical predictors of influenza in children. Arch Pediatr Adolesc Med. 2004; 158: 391-394.
6. Ohmit SE, Monto AS. Symptomatic predictors of influenza virus positivity in children during the influenza season. Clin Infect Dis. 2006; 43: 564-568.
7. Conway NT, Wake ZV, Richmond PC, Smith DW, Keil AD, Williams S, et al. Clinical predictors of influenza in young children: the limitations of “influenza-like illness”. J Pediatr Infect Dis Soc. 2013; 2: 21-29.
8. Casalegno J, Eibach D, Valette M, Enouf V, Daviaud I, Behillil S,et al. Performance of case definitions for influenza community surveillance: based on the French influenza surveillance network GROG, 2009-2014. Euro Surveill. 2015; 20: 21145.
9. Fitzner J, Qasmieh S, Mounts AW, Alexander B, Besselaar T, Briand S, et al. Revision of clinical case definitions: influenza-like illness and severe acute respiratory infection. Bull World Health Organ. 2018; 96: 122–128.
10. Centers for Disease Prevention and Control (CDC). Overview of influenza surveillance in the United States. Atlanta, GA: CDC. Disponible en: <http://www.cdc.gov/flu/weekly/overview.htm>. Acceso el 2 de julio de 2018.
11. 2012/506/UE: Decisión de Ejecución de la Comisión, de 8 de agosto de 2012, que modifica la Decisión 2002/253/CE, por la que se establecen las definiciones de los casos para comunicar las enfermedades transmisibles a la red comunitaria de conformidad con la Decisión n° 2119/98/CE del Parlamento Europeo y del Consejo [notificada con el número C(2012) 5538] Texto pertinente a efectos del EEE. Disponible en: <https://publications.europa.eu/en/publication-detail/-/publication/10ed460f-0711-11e2-8e28-01aa75ed71a1/language-es>. Acceso el 4 de julio de 2018.
12. Gill PJ, Richardson SE, Ostrow O, Friedman JN. Testing for respiratory viruses in children. To swab or not to swab. JAMA Pediatr. 2017; 17: 798-804.
13. American Academy of Pediatrics. Committee on Infectious Diseases. Recommendations for Prevention and Control of Influenza in Children, 2018–2019. Pediatrics. Oct 2018;142,4: e20182367.
14. Centers for Disease Control and Prevention. Guidance for Clinicians on the Use of Rapid Influenza Diagnostic Tests. <https://www.cdc.gov/flu/pdf/professionals/diagnosis/clinician_guidance_ridt.pdf>. Acceso el 2 de julio de 2018.
15. National Institute for Communicable Diseases. Influenza NICD recommendations for the diagnosis, prevention, management and public health response. Disponible en: <http://www,nicd.ac.za/wp-content/uploads/2017/03/Influenza-guidelines-final_24_05_2017.pdf>
16. Cohen R, Thollot F, Lécuyer A, Koskas M, Touitou R, Boucherat M, et al. Impact des tests de diagnostic rapide en ville dans la prise en charge des enfants en période de grippe. Archives de pédiatrie 2007; 14: 926–931
17. De La Rocque F, Lécuyer A, Wollner C, D’Athis P, Pecking M, Thollot F et al. Impact des tests de diagnostic rapide de la grippe dans la prise en charge des enfants en période d’épidémie en pédiatrie de ville. Arch Pediatr. 2009; 16: 288-293.
18. Doan Q, Enarson P, Kissoon N, Klassen TP, Johnson DW. Rapid viral diagnosis for acute febrile respiratory illness in children in the Emergency Department. Cochrane Database of Systematic Reviews 2014, Issue 9. Art. No.: CD006452. DOI: 10.1002/14651858.CD006452.pub4.
19. Poehling KA, Zhu Y, Tang YW, Edwards K. Accuracy and impact of a point-of-care rapid influenza test in Young children with respiratory illnesses. Arch Pediatr Adolesc Med. 2006; 160: 713–718.
20. Doan Q, Kissoon N, Whitehouse S, Dobson S, Cochrane D, Schmidt B, et al. A randomized, controlled trial of the impact of early and rapid diagnosis of viral infections in children brought to an Emergency Department with febrile respiratory tract illnesses. J Pediatr. 2009; 154: 91–95.
21. Bonner AB, Monroe KW, Talley LI, Klasner AE, Kimberlin DW. Impact of the rapid diagnosis of influenza on physician decision-making and patient management in the pediatric emergency department: results of a randomized, prospective, controlled trial. Pediatrics. 2003; 112: 363–367.
22. Iyer SB, Gerber MA, Pomerantz WJ, Mortensen JE, Ruddy RM. Effect of point-of-care influenza testing on management of febrile children. Acad Emerg Med. 2006; 13: 1259–1268.
23. Pierron S, Haas H, Berlioz B, Ollier L, Albertini M. Intèrêt du test de diagnostic rapide de la grippe aux urgences pédiatriques chez tout enfant âgé de moins de 6 ans et fébrile, en période épidémique. Arch Pediatr. 2008; 15: 1283-1828.
24. Lacroix S, Vrignaud B, Avril E, Moreau-Klein A, Coste M, Launay E, et al. Impact of rapid influenza diagnostic test on physician estimation of viral infection probability in paediatric emergency department during epidemic period. J Clin Virol. 2015; 72: 141–145.
25. Goriacko P, Saiman L, Zachariah P. Antibiotic use in hospitalized children with respiratory viruses detected by multiplex polymerase chain reaction. Pediatr Infect Dis J. 2018; 37: 443-446.
26. Rogers BB, Shankar P, Jerris RC, Kotzbaue Dr, Anderson EJ, Watson J, et al. Impact of a rapid respiratory panel test on patient outcomes. Arch Pathol Lab Med. 2015; 139: 636–641
27. Mitchell SL, Chang YC, Feemster K, Cardenas AM. Implementation of a rapid influenza A/B and RSV direct molecular assay improves emergency department oseltamivir use in paediatric patients. J Med Microbiol. 2018;67:358–363
28. Keske S, Ergönül O, Tutucu F, Karaaslan D, Palaoğlu E, Can F. The rapid diagnosis of viral respiratory tract infections and its impact on antimicrobial stewardship programs. Eur J Clin Microbiol Infect Dis. 2018; 37: 779-783.
29. Rogan DT, Mohit S., Kochar MS, Yang S, Quinny JV. Impact of rapid molecular respiratory virus testing on real-time decision making in a pediatric emergency department. J Mol Diagn. 2017; 19: 460e467.
30. Vecino-Ortiz AI, Goldenberg SD, Douthwait ST, Cheng CY, Glover RE, Mak C, Adams E. Impact of a multiplex PCR point-of-care test for influenza A/B and respiratory syncytial virus on an acute pediatric hospital Ward. Diagn Microbiol Infect Dis. 2018; <https://doi.org/10.1016/j.diagmicrobio.2018.03.013>
31. Li-Kim-Moy J, Dastouri F, Rashid H, Khandaker G, Kesson A, McCaskill M, et al. Utility of early influenza diagnosis through point-of-care testing in children presenting to an emergency department. J Paediatr Child Health. 2016; 52: 422-429.
32. Hoyat K, Duppenthaler A, Aebi C. Impact of the Availability of an Influenza Virus Rapid Antigen Test on Diagnostic Decision Making in a Pediatric Emergency Department. Pediatr Emerg Care. 2013; 29: 696-698.
33. Nitsch-Osuch A, Kuchar E, Golbiak I, Kanecki K, Tarka P, Brydak L. Rapid influenza diagnostic tests improve suitability of antiviral treatment in hospitalized children. Advs Exp Med Biol. 2017; 968: 1-6.
34. Busson L, Mahadeb B, De Foor M, Vandenberg O. Hallin M. Contribution of a rapid inluenza diagnostic test to manage hospitalized patients with suspected influenza. Diagn Microbiol Infect Dis. 2017; 87: 238-242.
35. Pollara CP, Piccinelli G, Rossi G, et al. Nosocomial outbreak of the pandemic influenza A (H1N1) 2009 in critical hematologic patients during seasonal influenza 2010‒2011: detection of oseltamivir resistant variant viruses. BMC Infect Dis. 2013; 13: 127e133.
36. Gooskens J, Jonges M, Claas ECJ, et al. Morbidity and mortality associated with nosocomial transmission of oseltamivir-resistant influenza A (H1N1). JAMA. 2009; 301: 1042e1046.
37. Bouscambert M, Valette M, Lina B. Rapid bedside tests for diagnosis, management, and prevention of nosocomial influenza. J Hosp. Infect. 2015; 89: 314e318.
38. [Merckx J](https://www.ncbi.nlm.nih.gov/pubmed/?term=Merckx%20J%5BAuthor%5D&cauthor=true&cauthor_uid=28869986), [Wali R](https://www.ncbi.nlm.nih.gov/pubmed/?term=Wali%20R%5BAuthor%5D&cauthor=true&cauthor_uid=28869986), [Schiller I](https://www.ncbi.nlm.nih.gov/pubmed/?term=Schiller%20I%5BAuthor%5D&cauthor=true&cauthor_uid=28869986), [Caya C](https://www.ncbi.nlm.nih.gov/pubmed/?term=Caya%20C%5BAuthor%5D&cauthor=true&cauthor_uid=28869986), [Gore GC](https://www.ncbi.nlm.nih.gov/pubmed/?term=Gore%20GC%5BAuthor%5D&cauthor=true&cauthor_uid=28869986), [Chartrand C](https://www.ncbi.nlm.nih.gov/pubmed/?term=Chartrand%20C%5BAuthor%5D&cauthor=true&cauthor_uid=28869986), et al. Diagnostic Accuracy of Novel and Traditional Rapid Tests for Influenza Infection Compared With Reverse Transcriptase Polymerase Chain Reaction: A Systematic Review and Meta-analysis. Ann Intern Med. 2017;167,6:394-409.
39. Gordon A, Reingold A. The Burden of Influenza: a Complex Problem. Curr Epidemiol Rep. 2018; 5:1–9.
40. Uyeki TM . Influenza diagnosis and treatment in children: a review of studies on clinically useful tests and antiviral treatment for influenza. Pediatr Infect Dis J. 2003;22:164–177.
41. Chartrand C, Leeflang MM, Minion J, Brewer T, Pai M. Accuracy of rapid influenza diagnostic tests: a meta-analysis. Ann Intern Med. 2012;156(7):500–511.
42. Davis S, Allen AJ, O´Leary R, Power M, Price DA, Simpson AJ, et al. Diagnostic accuracy and cost analysis of the AlereTM i Influenza A&B near-patient test using throat swabs. Hosp Infect.207; 97: 301-309.
43. American Academy of Pediatrics. Influenza. In: Red Book:2015 Report of the Committeeon Infectious Diseases, 30th ed, Kimberlin DW, Brady MT, Jackson MA, Long SS (eds), American Academy of Pediatrics, Elk Grove Vilage, IL 2015. P.476.
44. Robinson JL, Lee BE, Kothapalli S, et al. Use of thrat swab or saliva specimens for detection of respiratory viruses in children. Clin Infect Dis 2008; 46:e61
45. Frazee BW, Rodríguez-Hoces de la Guardia A, Alter H, et al. Accuracy and Discomfort of Different Types of Intranasal Specimen Collection Methods for Molecular Testing in Emergency Department Patients. Ann Emerg Med 2018; 71:509.
46. Bueno M, Calvo C, Méndez-Echevarría A, De José MI, Santos M, Carrasco J, et al. Oseltamivir Treatment for Influenza in Hospitalized Children Without Underlying Diseases. Pediatric Infect Dis J, 2013; 32,10:1066-1069.
47. [Calvo C](https://www.ncbi.nlm.nih.gov/pubmed/?term=Calvo%20C%5BAuthor%5D&cauthor=true&cauthor_uid=26980232), [García-García ML](https://www.ncbi.nlm.nih.gov/pubmed/?term=Garc%C3%ADa-Garc%C3%ADa%20ML%5BAuthor%5D&cauthor=true&cauthor_uid=26980232),[Pozo F](https://www.ncbi.nlm.nih.gov/pubmed/?term=Pozo%20F%5BAuthor%5D&cauthor=true&cauthor_uid=26980232),[Casas I](https://www.ncbi.nlm.nih.gov/pubmed/?term=Casas%20I%5BAuthor%5D&cauthor=true&cauthor_uid=26980232). Considerations on antiviral treatment of suspected influenza infections in hospitalised children. Enferm Infecc Microbiol Clin, 2016; 34,10:686-687.
48. [Fry AM](https://www.ncbi.nlm.nih.gov/pubmed/?term=Fry%20AM%5BAuthor%5D&cauthor=true&cauthor_uid=24268590), [Goswami D](https://www.ncbi.nlm.nih.gov/pubmed/?term=Goswami%20D%5BAuthor%5D&cauthor=true&cauthor_uid=24268590), [Nahar K](https://www.ncbi.nlm.nih.gov/pubmed/?term=Nahar%20K%5BAuthor%5D&cauthor=true&cauthor_uid=24268590), [Sharmin AT](https://www.ncbi.nlm.nih.gov/pubmed/?term=Sharmin%20AT%5BAuthor%5D&cauthor=true&cauthor_uid=24268590), [Rahman M](https://www.ncbi.nlm.nih.gov/pubmed/?term=Rahman%20M%5BAuthor%5D&cauthor=true&cauthor_uid=24268590) , [Gubareva L](https://www.ncbi.nlm.nih.gov/pubmed/?term=Gubareva%20L%5BAuthor%5D&cauthor=true&cauthor_uid=24268590), et al. Efficacy of oseltamivir treatment started within 5 days of symptom onset to reduce influenza illness duration and virus shedding in an urban setting in Bangladesh: a randomized-placebo-controlled trial. Lancet Infect Dis 2014; 14(2):109-118.
49. Jefferson T, Jones MA, Doshi P, DelMar CB, Hama R, Thompson MJ, et al. Neuraminidase inhibitors for preventing and treating influenza in adults and children. Cochrane Database of Systematic Reviews 2014, Issue 4. Art. No.: CD008965 (page 173).
50. [Whitley RJ](https://www.ncbi.nlm.nih.gov/pubmed/?term=Whitley%20RJ%5BAuthor%5D&cauthor=true&cauthor_uid=11224828), [Hayden FG](https://www.ncbi.nlm.nih.gov/pubmed/?term=Hayden%20FG%5BAuthor%5D&cauthor=true&cauthor_uid=11224828), [Reisinger KS](https://www.ncbi.nlm.nih.gov/pubmed/?term=Reisinger%20KS%5BAuthor%5D&cauthor=true&cauthor_uid=11224828), [Young N](https://www.ncbi.nlm.nih.gov/pubmed/?term=Young%20N%5BAuthor%5D&cauthor=true&cauthor_uid=11224828), [Dutkowski R](https://www.ncbi.nlm.nih.gov/pubmed/?term=Dutkowski%20R%5BAuthor%5D&cauthor=true&cauthor_uid=11224828), [Ipe D](https://www.ncbi.nlm.nih.gov/pubmed/?term=Ipe%20D%5BAuthor%5D&cauthor=true&cauthor_uid=11224828), et al. Oral oseltamivir treatment of influenza in children. [Pediatr Infect Dis J.](https://www.ncbi.nlm.nih.gov/pubmed/11224828) 2001; 20,2:127-133.
51. Heinonen S, Silvennoinen H, Lehtinen P, Vainionpa R, Vahlberg T, Ziegler T, et al. Early Oseltamivir Treatment of Influenza in Children 1–3 Years of Age: A Randomized Controlled Trial. Clin Infect Dis 2010; 51,8:887–894.
52. Muthuri SG, Venkatesan S, Myles PR, Leonardi-Bee j, Al Khuwaitir TS, Al Mamun A, et al. Effectiveness of neuraminidase inhibitors in reducing mortality in patients admitted to hospital with influenza A H1N1pdm09 virus infection: a meta-analysis of individual participant data. Lancet Respir Med 2014; 2,5:395-404.
53. Muthuri SG, Venkatesan S, Myles PR, Leonardi-Bee J, Lim WS, Al Mamun A, et al. Impact of neuraminidase inhibitors on influenza A(H1N1) pdm09-related pneumonia: an individual participant data meta-analysis. Influenza Other Respir Viruses 2016, 10,3, 192–204.
54. Louie JK, Yang S, Samuel MC, Uyeki TM, Schechter R. Neuraminidase Inhibitors for Critically Ill Children With Influenza. Pediatrics. 2013; 132:e1539-45.
55. European Centre for Disease Prevention and Control. Expert opinion on neuraminidase inhibitors for the prevention and treatment of influenza – review of recent systematic reviews and meta-analyses. Stockholm: ECDC; 2017. ISBN 978-92-9498-080-9 doi: 10.2900/01723
56. Muthuri SG, Myles PR, Venkatesan S, Leonardi-Bee J, Nguyen-Van-Tam JS. Impact of neuraminidase inhibitor treatment on outcomes of public health importance during the 2009-2010 influenza A(H1N1) pandemic: a systematic review and meta-analysis in hospitalized patients. J Infect Dis. 2013;207,4:553-563.
57. Eriksson C, Graham DA, Uyeki TM, Randolph AG. Risk factors for mechanical ventilation in U.S. children hospitalized with seasonal influenza and 2009 pandemic influenza A. Pediatr Crit Care Med 2012; 13,6:625-631.
58. Launes C, García-García JJ, Jordán I, Martínez-Planas A, Selva L, Muñoz-Almagro C. 2009 Influenza A H1N1 Infections Delays In Starting Treatment With Oseltamivir Were Associated With A More Severe Disease. Pediatr Infect Dis J. 2010; 30,7:622-625.
59. Sachedina N, Donaldson LJ Paediatric mortality related to pandemic influenza A H1N1 infection in England: an observational population-based study. Lancet. 2010;376,9755:1846-1852.
60. Coffin SE, Zaoutis TE, Rosenquist AB, Heydon K, Herrera G, Bridges CB, Watson B, Localio R, Hodinka RL, Keren R. Incidence, complications, and risk factors for prolonged stay in children hospitalized with community-acquired influenza. Pediatrics. 2007;119,4:740-8.
61. Shi L, Loveless M, Spagnuolo P, Zhang M, Liu S, Liu J, et al. Antiviral Treatment of Influenza in Children: A Retrospective Cohort Study. Adv Ther, 2014; 31:735–750.
62. Lim JK, Kilgore PE, Aiello AE, Foxman B, Letson GW, Jang GY, et al. Impact of time to treatment of oseltamivir on influenza hospitalization cost among Korean children. [Pediatr Int](https://www.ncbi.nlm.nih.gov/pubmed/?term=Impact+of+time+to+treatment+of+oseltamivir+on+influenza+hospitalization+cost+among+Korean+children) 2015; 57:393–400.
63. Wang K, Shun-Shin M, Gill P, Perera R, Harnden A. Neuraminidase inhibitors for preventing and treating influenza in children (published trials only). Cochrane Database of Systematic Reviews 2012, Issue 4. Art. No.: CD002744.
64. Malosh RE, Martin ET, Heikkinen T, Brooks WA, Whitley RJ, Monto AS. Efficacy and Safety of Oseltamivir in Children: Systematic Review and Individual Patient Data Meta-analysis of Randomized Controlled Trials. Clin Infect Dis. 2018; 66:1492-1500.
65. Spagnuolo PJ, Zhang M, Xu Y, Han J, Liu S, Liu Jet al. Effects of antiviral treatment on influenza-related complications over four influenza seasons: 2006–2010, Current Medical Research and Opinion. 2016; 32:8, 1399-1407, DOI: [10.1080/03007995.2016.1176016](https://doi.org/10.1080/03007995.2016.1176016).
66. Venkatesan S, Myles PR, Leonardi-Bee J, Muthuri SG, Al Masri M, Andrews N, et al. Impact of Outpatient Neuraminidase Inhibitor Treatment in Patients Infected With Influenza A(H1N1)pdm09 at High Risk of Hospitalization: An Individual Participant Data Metaanalysis. Clin Infect Dis. 2017 May 15;64,10:1328-1334. doi: 10.1093/cid/cix127. PubMed PMID: 28199524; PubMed Central PMCID: PMC5411393.
67. Nakamura Y, Sugawara T, Ohkusa Y, Taniguchi K, Miyazaki C, Momoi M, et al. (2015) Life-Threatening Abnormal Behavior Incidence in 10–19 Year Old Patients Administered Neuraminidase Inhibitors. PLoS ONE 10,7: e0129712. <https://doi.org/10.1371/journal.pone.0129712>

Dawood FS, Jara J, Gonzalez R, et al. A randomised, doublé-bind, placebo-controled trial evaluating the safety of early oseltamivir treatment among children 0-9 years of age hospitalized with influenza in El Salvador and Panama. Antiviral Res. 2016;13:85-94, doi:10.1016/l.antiviral.2016.07.007

1. Bradley JS, Blumer JL, Romero JR, Michaels MG, Munoz FM, Kimberlin DW, et al. Intravenous Zanamivir in Hospitalized Patients With Influenza. Pediatrics. 2017 Nov;140,5. pii: e20162727. doi: 0.1542/peds.2016-2727. PubMed PMID: 29051331.
2. Centers for Disease Control and Prevention. Influenza Antiviral Medications: Summary for Clinicians. Disponible en: https://www.cdc.gov/flu/professionals/antivirals/summary-clinicians.htm. (cited:2017 oct 20).
3. Michiels B, Van Puyenbroeck K, Verhoeven V, Vermeire E, Coenen S. The Value of Neuraminidase Inhibitors for the Prevention and Treatment of 5Seasonal Influenza: A Systematic Review of Systematic Reviews. PLoS ONE. 2013; 8,4: e60348. doi:10.1371/journal.pone.0060348.
4. Johnston SL, Ferrero F, García ML, Dutkowski R. Oral oseltamivir improves pulmonary function and reduces exacerbation frecuency for influenza-infected children with asthma. Pediatr Infect Dis J. 2005; 24: 225-232.
5. Heneghan CJ, Onakpoya I, Jones MA, Doshi P, Del Mar CB, Hama R, et al. Neuraminidase inhibitors for influenza: a systematic review and meta-analysis of regulatory and mortality data. Health Technol Assess. 2016;20,42. Burch J, Paulden M, Conti S, Stock C, Corbett M, Welton NJ, et al. Antiviral drugs for the treatment of influenza: a systematic review and economic evaluation. Health Technol Assess. 2009;13(58)
6. LaForceC, Man CY, Henderson FW, McElhaney JE, Hampel FC Jr, et al. Efficacy and safety of inhaled zanamivir in the prevention of influenza in community-dwelling, high-risk adult and adolescent subjects: a 28-day, multicenter, randomized, double-blind, placebo-controlled trial. Clin Ther. 2007; 29: 1579-1590.
7. [Jefferson T](https://www.ncbi.nlm.nih.gov/pubmed/?term=Jefferson%20T%5BAuthor%5D&cauthor=true&cauthor_uid=21735402), [Del Mar CB](https://www.ncbi.nlm.nih.gov/pubmed/?term=Del%20Mar%20CB%5BAuthor%5D&cauthor=true&cauthor_uid=21735402), [Dooley L](https://www.ncbi.nlm.nih.gov/pubmed/?term=Dooley%20L%5BAuthor%5D&cauthor=true&cauthor_uid=21735402), [Ferroni E](https://www.ncbi.nlm.nih.gov/pubmed/?term=Ferroni%20E%5BAuthor%5D&cauthor=true&cauthor_uid=21735402), [Al-Ansary LA](https://www.ncbi.nlm.nih.gov/pubmed/?term=Al-Ansary%20LA%5BAuthor%5D&cauthor=true&cauthor_uid=21735402), [Bawazeer GA](https://www.ncbi.nlm.nih.gov/pubmed/?term=Bawazeer%20GA%5BAuthor%5D&cauthor=true&cauthor_uid=21735402), et al. [Physical interventions to interrupt or reduce the spread of respiratory viruses.](https://www.ncbi.nlm.nih.gov/pubmed/20091588) Cochrane Database Syst ev. 2011 Jul 6;7:CD006207. doi: 10.1002/14651858.CD006207.pub4.
8. Harper SA, Bradley JS, Englund JA, et al. Seasonal influenza in adults and children: diagnosis, treatment, chemoprophylaxis, and institucional outbreak management: clinical practice guideline of the Infectious Disease Society of America. Clin Infect Dis. 2009; 48: 1003-1032.
9. García A, Fernández Prada M, Aristegui J , Moreno D , Redondo E , Jimeno I , García Cenoz M, López Trigo JA. Documento de actualización y reflexión sobre la vacunación antigripal en España. 2018. ISBN: 978-84-17394-12-7. Disponible en http://vacunasaep.org/sites/vacunasaep.org/files/gripe-documento-aev-aep-semergen-semg-sempsph-segg.pdf

1. [↑](#endnote-ref-1)
